# Supplementary material for: Traditional Chinese Medication Qiliqiangxin attenuates cardiac remodeling after acute myocardial infarction in mice
Source: PubMed Central journal article supplement (PMC4648480; doi:10.1038/srep08374), 2015-02-11

## Traditional Chinese Medication Qiliqiangxin attenuates cardiac remodeling after acute myocardial infarction in mice

Lichan Tao, Sutong Shen, Siyi Fu, Hongyi Fang, Xiuzhi Wang, Saumya Das, Joost PG Sluijter, Anthony Rosenzweig, Yonglan Zhou, Xiangqing Kong, Junjie Xiao, Xinli Li

### SUPPLEMENTAL MATERIAL

#### Supplemental Table 1 Primers used in this study

| Gene       | Species | Forward Primer          | Reverse Primer         |
|------------|---------|-------------------------|------------------------|
| PPAR alpha | mouse   | AGAGCCCCATCTGTCCTCTC    | ACTGGTAGTCTGCAAAACCAAA |
| PPAR delta | mouse   | TCCATCGTCAACAAAGACGGG   | ACTTGGGCTCAATGATGTCAC  |
| PPAR gamma | mouse   | TCCTGTAAAAGCCCGGAGTAT   | GCTCTGGTAGGGGCAGTGA    |
| PGC-1alpha | mouse   | TATGGAGTGACATAGAGTGTGCT | CCACTTCAATCCACCCAGAAAG |
| PGC-1beta  | mouse   | CTTGGCTGCGCTTACGAAGA    | GAAAGCTCGTCCACGTCAGAC  |
| Adipoq     | mouse   | ATGACGACTGCCATCCTAGAG   | GCTCCCTAAAGAGCTGGGG    |
| LPL        | mouse   | GGTTGCGCGTAGAGAGGATG    | CTCACGCTCTGACATGCCTTC  |

|         |       |                         |                         |
|---------|-------|-------------------------|-------------------------|
| Nr1h3   | mouse | CTCAATGCCTGATGTTTCTCCT  | TCCAACCCTATCCCTAAAGCAA  |
| Acadl   | mouse | TCTTTTCCTCGGAGCATGACA   | GACCTCTCTACTCACTTCTCCAG |
| Acadm   | mouse | AGGGTTTAGTTTTGAGTTGACGG | CCCCGCTTTTGTCATATTCCG   |
| Acox1   | mouse | TAACTTCCTCACTCGAAGCCA   | AGTTCCATGACCCATCTCTGTC  |
| Acox3   | mouse | ACCGGAAGAAAAGACAGTGC    | GAGGCTCTTGCTCGGTAGG     |
| Acs11   | mouse | TGCCAGAGCTGATTGACATTC   | GGCATAACCAGAAGGTGGTGAG  |
| Acs14   | mouse | CTCACCATTATATTGCTGCCTGT | TCTCTTTGCCATAGCGTTTTTCT |
| Acs15   | mouse | TCCTGACGTTTGGAACGGC     | CTCCCTCAATCCCCACAGAC    |
| cpt1a   | mouse | CTCCGCCTGAGCCATGAAG     | CACCAGTGATGATGCCATTCT   |
| cpt1b   | mouse | GCACACCAGGCAGTAGCTTT    | CAGGAGTTGATTCCAGACAGGTA |
| cpt2    | mouse | CAGCACAGCATCGTACCCA     | TCCAATGCCGTTCTCAAAT     |
| cyp27a1 | mouse | CCAGGCACAGGAGAGTACG     | GGGCAAGTGCAGCACATAG     |
| Ehhadh  | mouse | ATGGCTGAGTATCTGAGGCTG   | GGTCCAAACTAGCTTTCTGGAG  |

|         |       |                        |                         |
|---------|-------|------------------------|-------------------------|
| Fads2   | mouse | AAGGGAGGTAACCAGGGAGAG  | CCGCTGGGACCATTTGGTAA    |
| Scd1    | mouse | ACTGTGGAGACGTGTTCTGGA  | ACGGGTGTCTGGTAGACCTC    |
| Angptl4 | mouse | CATCCTGGGACGAGATGAACT  | TGACAAGCGTTACCACAGGC    |
| Sorbs1  | mouse | CCCCGTCTGAGGTAATAGTTGT | CATCGAGTGTCGGGAAGGTC    |
| Apoa1   | mouse | GGCACGTATGGCAGCAAGAT   | CCAAGGAGGAGGATTCAAACCTG |
| Apoc3   | mouse | TACAGGGCTACATGGAACAAGC | CAGGGATCTGAAGTGATTGTCC  |
| ApoE    | mouse | CTGACAGGATGCCTAGCCG    | CGCAGGTAATCCCAGAAGC     |
| PECAM   | mouse | ACGCTGGTGCTCTATGCAAG   | TCAGTTGCTGCCCATTCATCA   |
| GYK     | mouse | TGAACCTGAGGATTTGTCAGC  | CCATGTGGAGTAACGGATTTCG  |
| Dgat1   | mouse | TCCGTCCAGGGTGGTAGTG    | TGAACAAAGAATCTTGCAGACGA |
| Pck2    | mouse | ATGGCTGCTATGTACCTCCC   | GCGCCACAAAGTCTCGAAC     |
| MMP9    | mouse | CTGGACAGCCAGACACTAAAG  | CTCGCGGCAAGTCTTCAGAG    |
| GAPDH   | mouse | AGGTCGGTGTGAACGGATTTG  | TGTAGACCATGTAGTTGAGGTCA |

---

## **Supplemental Figure Legends**

**Supplemental Figure 1 Qiliqiangxin (QLQX) improves cardiac function at a dosage of 0.75g/kg/d while a lower dosage of QLQX (0.25g/kg/d) failed to exhibit the beneficial effect**

ns, not significant; \*\*, P<0.01; \*\*\*, P<0.001. n=10 per group.

**Supplemental Figure 2 PPAR $\gamma$  activation but not PPAR $\alpha$  improves cardiac function in AMI**

**A**, The PPAR $\alpha$  activator increases the expression of PPAR $\alpha$ . \*\*, P<0.01. n=3 per group. Cropped blots were used here and the full-length gels were included in the supplementary information. **B**, The PPAR $\gamma$  activator increases the expression of PPAR $\gamma$ . \*\*\*, P<0.001. n=3 per group. Cropped blots were used here and the full-length gels were included in the supplementary information. **C**, PPAR $\alpha$  activation regulates its downstream target genes. \*, P<0.05; \*\*, P<0.01; \*\*\*, P<0.001. n=6 per group. **D**, PPAR $\gamma$  activation regulates its downstream target genes. \*, P<0.05; \*\*, P<0.01; \*\*\*, P<0.001. n=6 per group. **E**, Representative echocardiographic images. **F**, PPAR $\alpha$  activation does not affect cardiac function after AMI. n=6 per group. **G**, PPAR $\gamma$  activation improves cardiac function after AMI. \*\*\*, P<0.001. n=6 per group.

**Supplemental Figure 3 PPAR $\gamma$  inhibitor does not affect the physiological parameters of cardiac function**

**A**, Left ventricular ejection fraction (EF). **B**, left ventricular fractional shortening (FS). **C**, Left ventricular internal dimension-diastole (LVIDd). **D**, Left ventricular internal dimension-systole (LVIDs). n=6 per group.

# Supplemental Figure 1

A

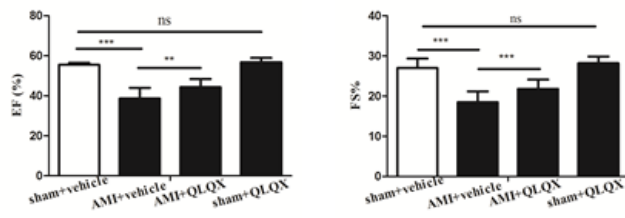

B

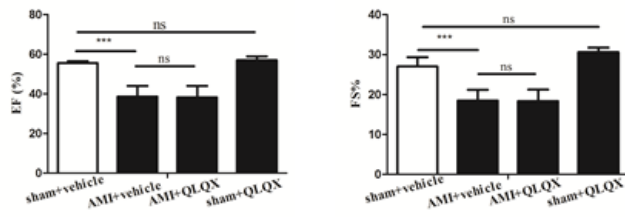

# Supplemental Figure 2

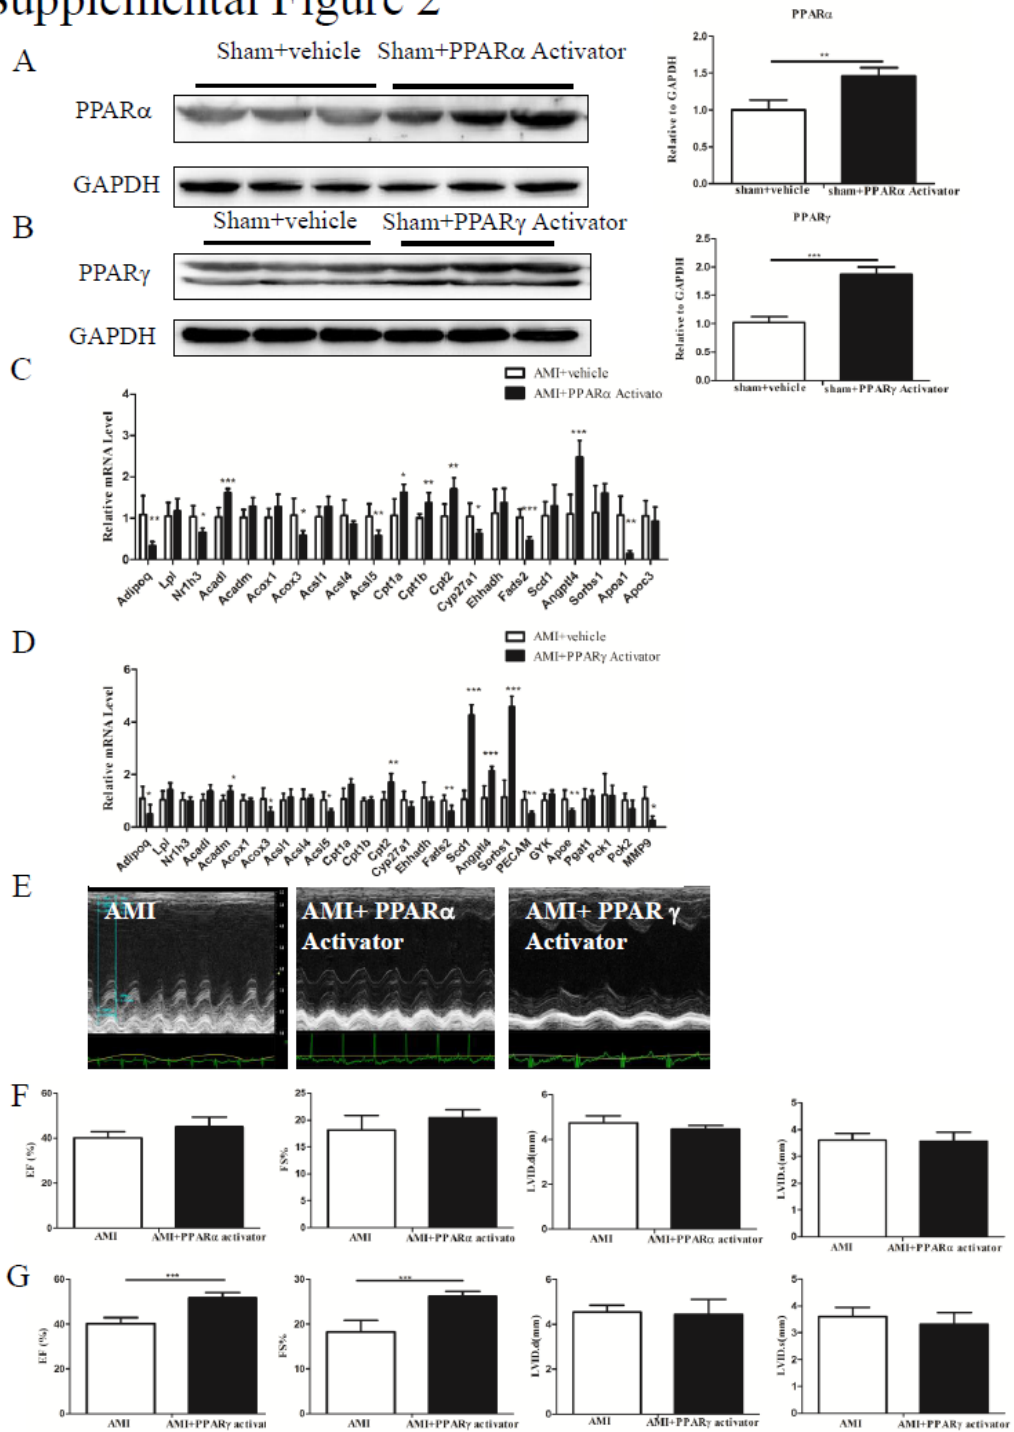

# Supplemental Figure 3

A

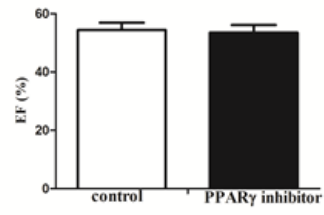

B

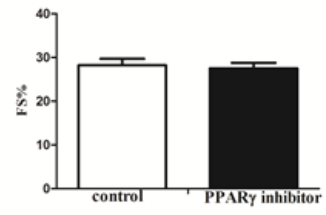

C

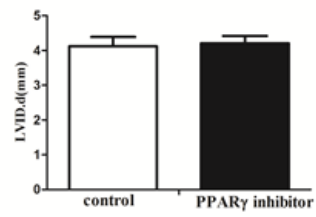

D

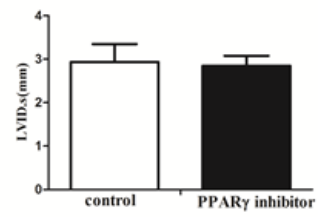

## Full-length gels

Figure 2C

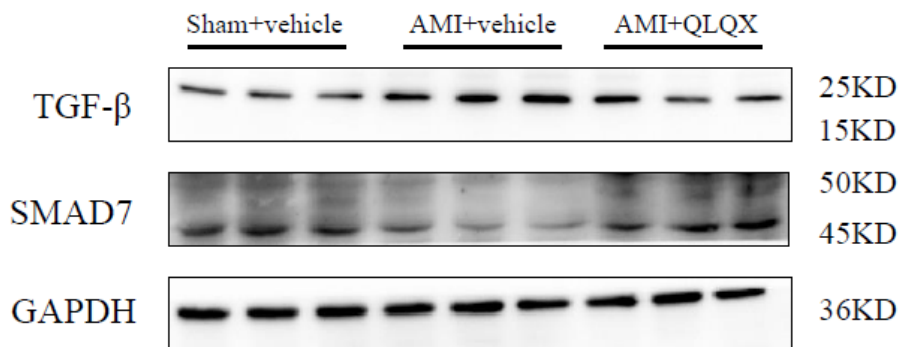

Figure 2D

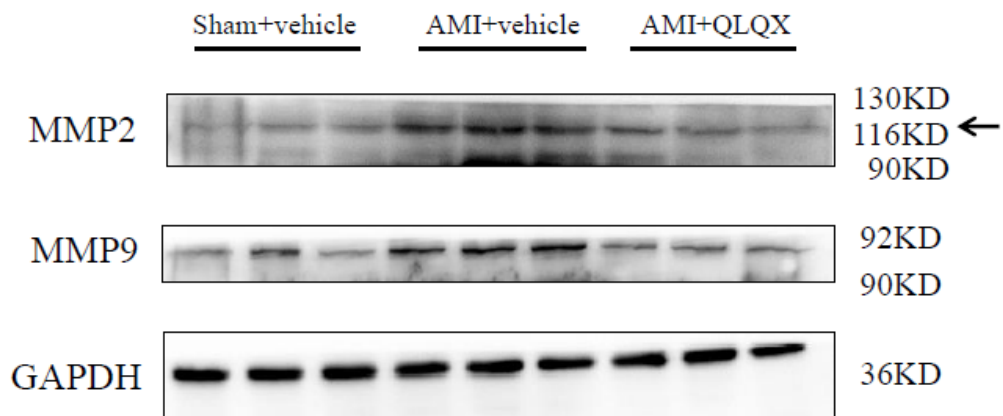



Figure 3B

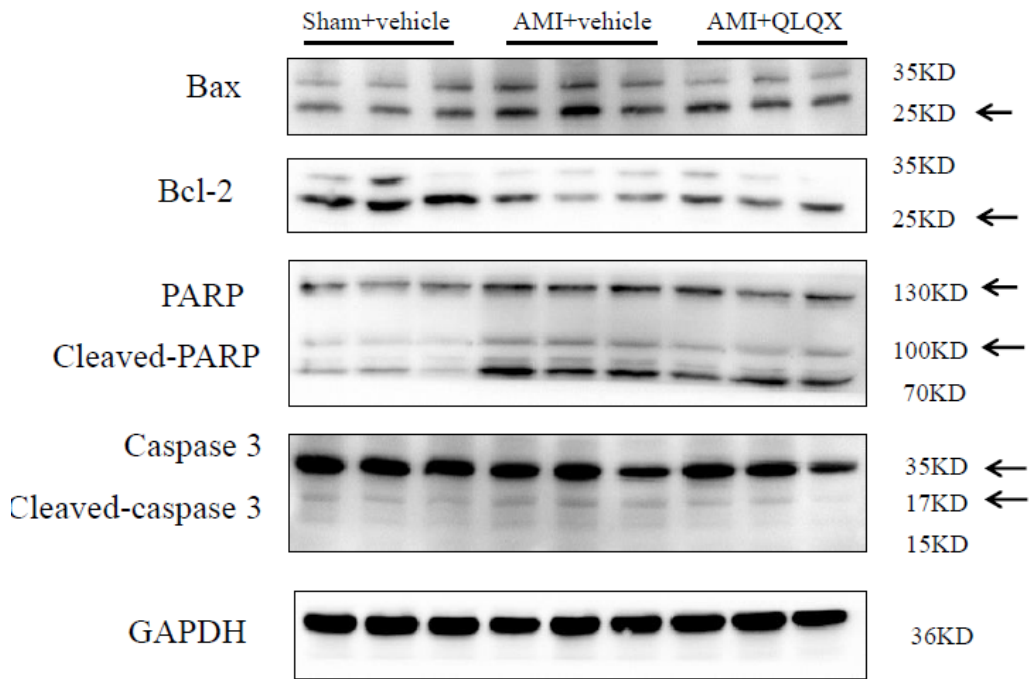

Figure 4 B

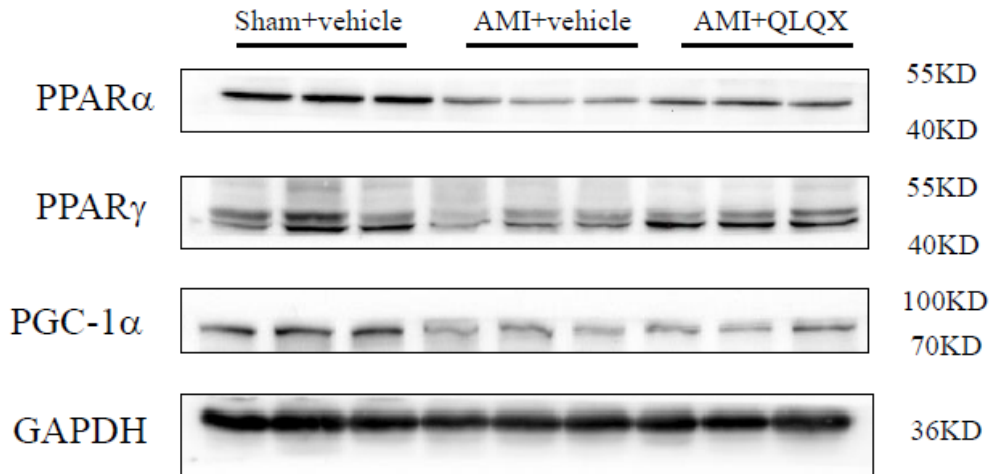

Figure 4 C

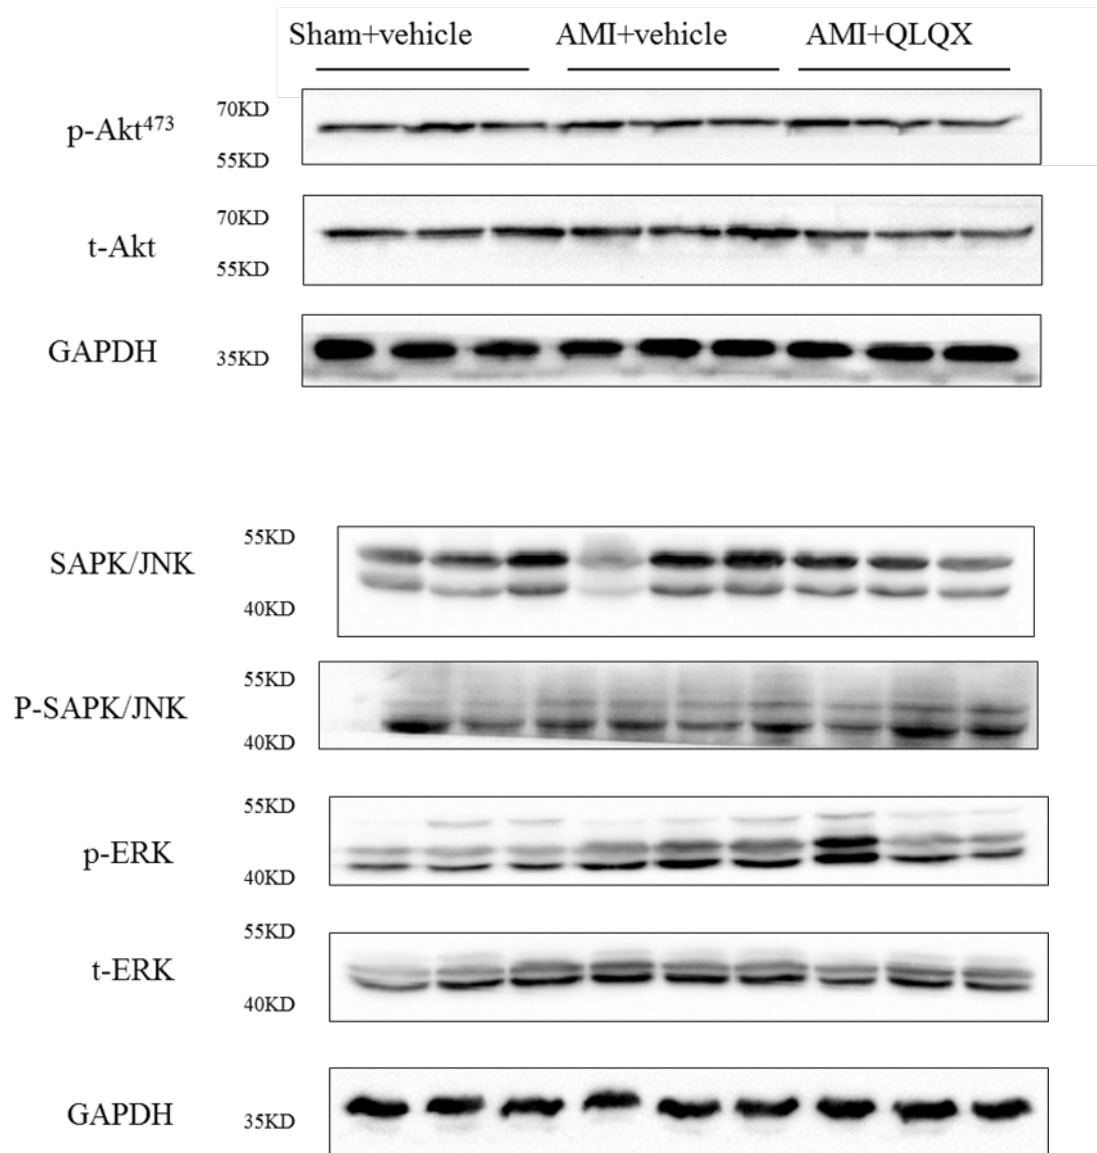

Figure 5A

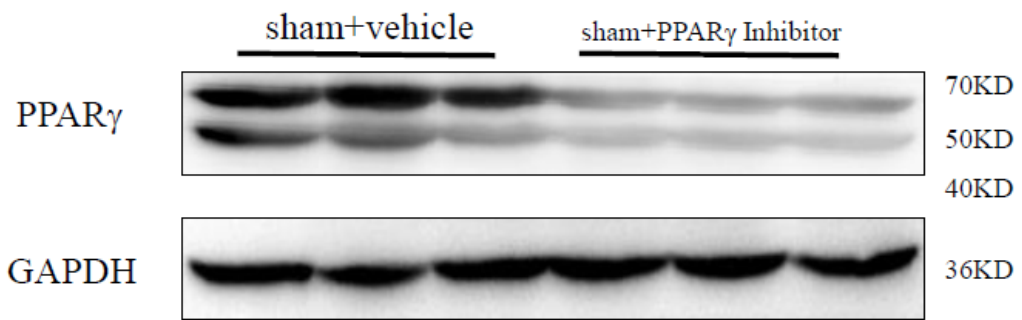

Figure 6B

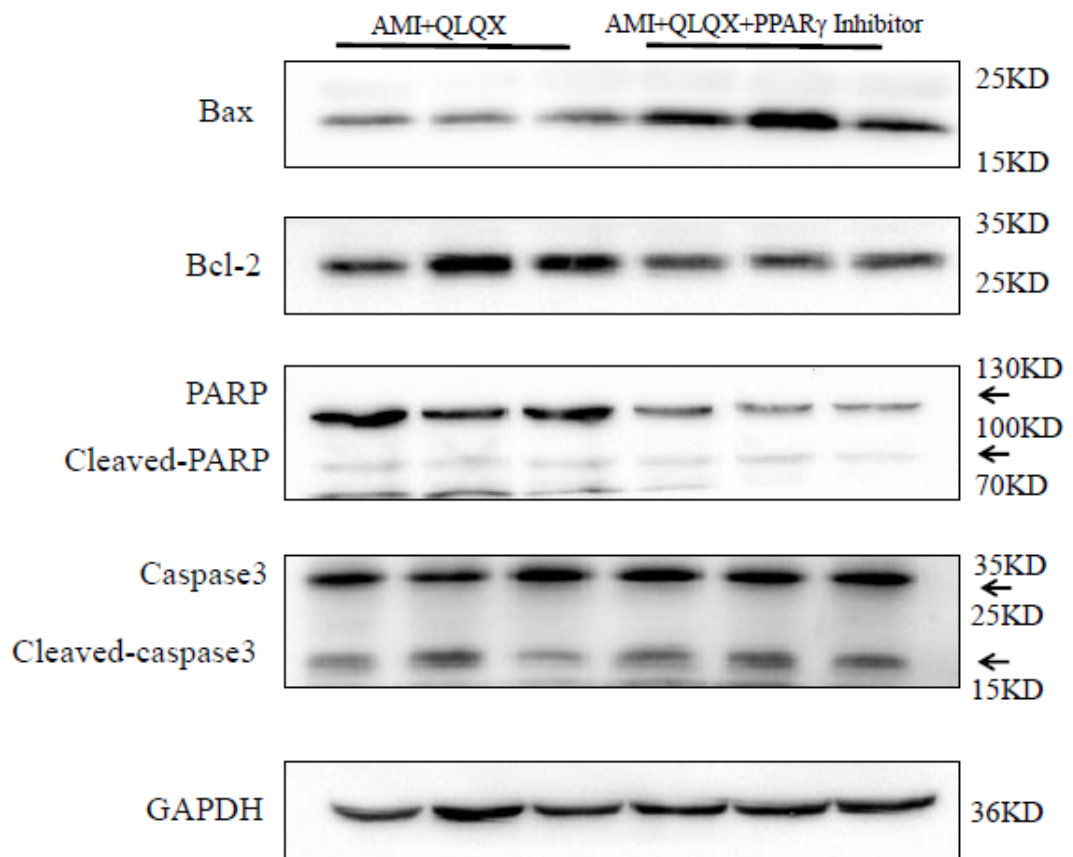

Supplemental Figure 2

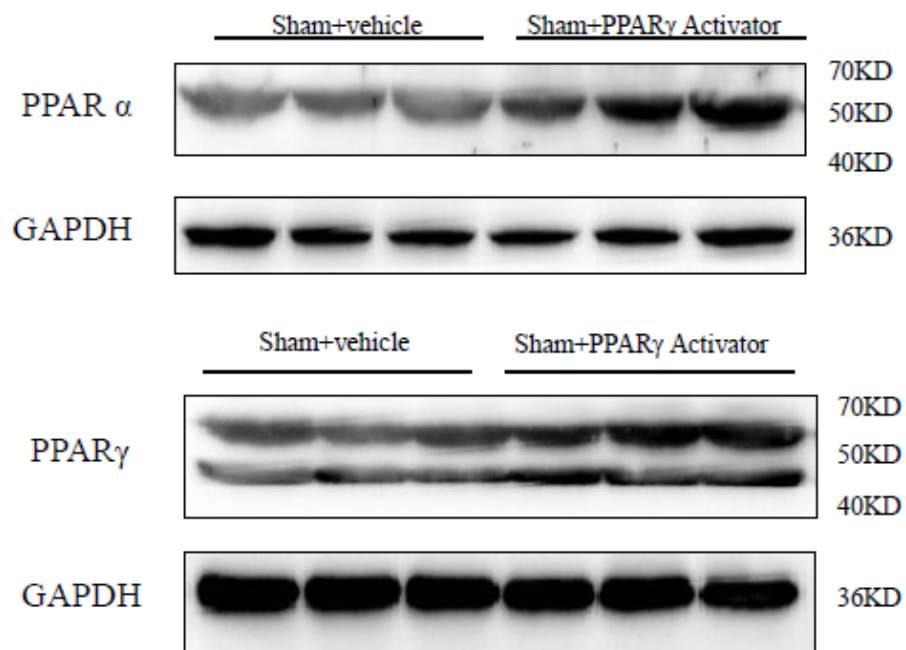

Supplement: srep08374-s1.pdf [file srep08374-s1.pdf]
